# Supplementary material for: Salvia Species: Biotechnological Strategies Applied to In Vitro Cultures for the Controlled Production of Bioactive Diterpenoids
Source: MDPI journal article supplement (doi:10.3390/agronomy14040835), 2024-04-17
Supplement: s1 [file s1]

## Supplementary Materials

# ***Salvia* species: biotechnological strategies applied on *in vitro* cultures for the controlled production of bioactive diterpenoids**

Roméo Arago Dougué Kentsop<sup>1</sup>, Poonam Devi<sup>2</sup>, Andrea Copetta<sup>3</sup>, Barbara Ruffoni<sup>3</sup>, Valentina Parisi<sup>4</sup>, Angela Bisio<sup>2</sup> and Valeria Iobbi<sup>2</sup>

<sup>1</sup> Institute of Agricultural Biology and Biotechnology, National Research Council, Via Bassini 15, 20133 Milan, Italy; dougue@ibba.cnr.it

<sup>2</sup> Department of Pharmacy, University of Genova, Viale Cembrano 4, 16148 Genova, Italy; poonam.devi@edu.unige.it, angela.bisio@unige.it; valeria.iobbi@edu.unige.it

<sup>3</sup> Consiglio per la Ricerca e la Sperimentazione in Agricoltura – CREA Centro di ricerca Orticoltura e Florovivaismo, Sanremo (IM), Italy; andrea.copetta@crea.gov.it, barbara.ruffoni@crea.gov.it

<sup>4</sup> Department of Pharmacy, University of Salerno, Via Giovanni Paolo II 132, 84084 Fisciano, Italy; vparisi@unisa.it

\* Correspondence: V.I. Valeria Iobbi: valeria.iobbi@edu.unige.it; A.B. Angela Bisio angela.bisio@unige.it

**Table S1.** Effect of microorganism interaction and their extracts on diterpenoids production in *in vitro Salvia* hairy roots cultures.

**Table S2.** Effect of methyl jasmonate and coronatine on diterpenoids production in *in vitro Salvia* hairy roots cultures.

**Table S3.** Effect of elicitors on diterpenoids production in *in vitro Salvia* cell cultures.

**Table S4.** Effect of yeast extract on diterpenoids production in *in vitro Salvia* hairy root cultures.

**Table S5.** Effect of Ag<sup>+</sup> on diterpenoids production in *in vitro Salvia* hairy roots cultures.

**Table S6a.** Effect of others chemical compounds on diterpenoids production in *in vitro Salvia* hairy roots cultures.

**Table S6b.** Effect of other elicitors on diterpenoids production in *in vitro Salvia* hairy root cultures.

**Table S7.** Effect of physical elicitors on diterpenoids production in *in vitro Salvia* hairy root cultures.

**Table S8.** Effect of combination of elicitors on diterpenoids production in *in vitro Salvia* hairy roots cultures.

**Table S9.** Effect of combination of elicitors on diterpenoids production in *in vitro Salvia* cell cultures.

**Table S1.** Effect of microorganism interaction and their extracts on diterpenoids production in *in vitro* *Salvia* hairy roots cultures.

| <i>Salvia</i><br><i>sp.</i>   | <i>A.</i><br><i>Rhizog</i><br><i>enes</i> | Culture<br>medium                                        | Growth<br>condition                                                                        | Elicitors                                                                   | Conc.            | Of            | Elicited<br>on day | Time<br>of<br>elicitation<br>n (days) | Biomass<br>vs<br>growth<br>CTRL                                            | Diterpenes<br>stimulated          | Yield of control | Yield after<br>elicitation | %<br>Increase<br>over the<br>control | Refere<br>nces |              |               |               |               |       |
|-------------------------------|-------------------------------------------|----------------------------------------------------------|--------------------------------------------------------------------------------------------|-----------------------------------------------------------------------------|------------------|---------------|--------------------|---------------------------------------|----------------------------------------------------------------------------|-----------------------------------|------------------|----------------------------|--------------------------------------|----------------|--------------|---------------|---------------|---------------|-------|
| <i>S. miltiorrhiza</i>        | ATCC<br>15834                             | MS<br>medium                                             | 0.3 g fresh root<br>in 25 mL<br>medium at<br>110–120 rpm<br>in dark and at<br>25°C         | <i>B. cereus</i>                                                            | 0.2%             | 0             | 28                 | Inhibit                               | TT                                                                         | 0.20 mg/g DW                      | 2.67 mg/g DW     | 1.250                      | [1]                                  |                |              |               |               |               |       |
|                               |                                           |                                                          |                                                                                            |                                                                             | Volumetric TT    |               |                    |                                       | 1.40 mg/L                                                                  | 10.4 mg/L                         | 660              |                            |                                      |                |              |               |               |               |       |
|                               |                                           |                                                          |                                                                                            | <i>B. cereus</i> (extract)                                                  | 100 mg/L         |               |                    |                                       | 0                                                                          | 28                                | Increase         | TT                         |                                      | 0.17 mg/g DW   | 0.54 mg/g DW | 100           |               |               |       |
|                               |                                           |                                                          |                                                                                            |                                                                             | 50%              |               |                    |                                       | Volumetric TT                                                              | 1,15 mg/L                         | 5.35 mg/L        | 250                        |                                      |                |              |               |               |               |       |
|                               |                                           |                                                          |                                                                                            | <i>B. cereus</i> (root–bacteria co-culture supernatant collected on day 21) | 5 mL (25% v/v)   |               |                    |                                       | 0                                                                          | 28                                | Inhibit          | TT                         |                                      | 0.16 mg/g DW   | 0.79 mg/g DW | 400           |               |               |       |
|                               |                                           |                                                          |                                                                                            |                                                                             | Volumetric TT    |               |                    |                                       | 0.85mg /L                                                                  | 3.95 mg/L                         | 360              |                            |                                      |                |              |               |               |               |       |
|                               | ATCC<br>15834                             | MS<br>medium                                             | 0.3 g fresh<br>hairy roots 25<br>mL medium at<br>110–120 rpm<br>in the dark<br>and at 25°C | <i>B. cereus</i> (Bacterial cells)                                          | 2.5%             | 0             | 7                  | Inhibit 50%                           | TT                                                                         | 0.15 mg/g DW                      | 2.78 mg/g DW     | 1.700                      | [2]                                  |                |              |               |               |               |       |
|                               |                                           |                                                          |                                                                                            |                                                                             | 18               |               |                    |                                       | 7                                                                          | Increase                          | Volumetric TT    | 1.82 mg/L                  |                                      | 22.4mg/L       | 1.100        |               |               |               |       |
|                               |                                           |                                                          |                                                                                            | <i>B. cereus</i> (extract)                                                  | 1g/L             |               |                    |                                       | 0                                                                          | 7                                 | Inhibit 50%      | TT                         |                                      | 0.17mg/g DW    | 2.04 mg/g DW | 1.100         |               |               |       |
|                               |                                           |                                                          |                                                                                            | Bacterial polysaccharide (BPS)                                              | 100 mg/L         |               |                    |                                       | 18                                                                         | 7                                 | Increase         | TT                         |                                      | 0.19 mg/g DW   | 1.59 mg/g DW | 700           |               |               |       |
|                               |                                           |                                                          |                                                                                            |                                                                             | 20%              |               |                    |                                       | Volumetric TT                                                              | 2,11mg/L                          | 21.6 mg/L        | 900                        |                                      |                |              |               |               |               |       |
|                               |                                           |                                                          |                                                                                            | C58C1                                                                       | 1/2 B5<br>medium |               |                    |                                       | 1.0 g fresh<br>roots in 100<br>medium at 180<br>rpm in dark<br>and at 25°C | <i>Trichoderma atroviride</i> D16 | 300 mg/L         | 21                         |                                      | 18             | Increase     | DT-I          | 0.039 mg/g DW | 1.338 mg/g DW | 3.400 |
| extract of mycelium (EM)      | 150 mg/L                                  | 21                                                       | 18                                                                                         |                                                                             |                  | Increase      | CT                 | 0.037 mg/g DW                         |                                                                            | 3.061 mg/g DW                     | 8.200            |                            |                                      |                |              |               |               |               |       |
| Polysaccharide fraction (PSF) | 180 mg/L                                  | 21                                                       | 18                                                                                         |                                                                             |                  | Increase      | DT-I               | 0.052 mg/g DW                         |                                                                            | 1.216 mg/g DW                     | 2.200            |                            |                                      |                |              |               |               |               |       |
|                               |                                           |                                                          | CT                                                                                         |                                                                             |                  | 0.053 mg/g DW | 1.216 mg/g DW      | 6.500                                 |                                                                            |                                   |                  |                            |                                      |                |              |               |               |               |       |
| ATCC<br>15834                 | MS<br>medium                              | Hairy roots<br>(0.3 g FW) into<br>40 mL<br>medium at 120 | Endophyticbacteria <i>Pseudomonas brassicacearum</i> subsp.<br><i>neoaurantiaca</i> (B1)   |                                                                             |                  | 0.025 %       | 21                 | 9                                     |                                                                            | Increase                          | TT               |                            | Not published                        |                |              | Not published | 270           | [4]           |       |
|                               |                                           |                                                          |                                                                                            |                                                                             |                  | DT-I          |                    |                                       |                                                                            |                                   | Not published    |                            | Not published                        |                |              | 1.820         |               |               |       |
|                               |                                           |                                                          |                                                                                            | CT                                                                          | Not published    | Not published |                    |                                       | 1.030                                                                      |                                   |                  |                            |                                      |                |              |               |               |               |       |

|                                   |        |                 |                                  |               |           |    |            |       |               |               |       |     |  |
|-----------------------------------|--------|-----------------|----------------------------------|---------------|-----------|----|------------|-------|---------------|---------------|-------|-----|--|
| rpm at 25°C<br>and in the<br>dark |        |                 |                                  |               |           |    |            |       |               |               |       |     |  |
| ATCC                              | MS     | Hairy roots     | <i>Streptomyces pactum</i> Act12 | 2%            | 21        | 14 | No         | T-I   | Not published | Not published | 458   | [5] |  |
| 15834                             | medium | (0.3 g FW) into |                                  |               |           |    | difference | T-IIA | Not published | Not published | 1.077 |     |  |
|                                   |        | 40 mL           |                                  |               |           |    |            | DT-I  | Not published | Not published | 742   |     |  |
|                                   |        | medium at 120   |                                  |               |           |    |            | CT    | Not published | Not published | 1.221 |     |  |
|                                   |        | rpm at 25°C     |                                  |               |           |    |            | TT    | Not published | Not published | 819   |     |  |
|                                   |        | and in the      |                                  | 4%            |           |    | Slightly   | T-I   | Not published | Not published | 467   |     |  |
|                                   |        | dark            |                                  |               |           |    | inhibit    | T-IIA | Not published | Not published | 936   |     |  |
|                                   |        |                 |                                  |               |           |    | 9.89%      | DT-I  | Not published | Not published | 1.431 |     |  |
|                                   |        |                 |                                  |               |           |    |            | CT    | Not published | Not published | 3.263 |     |  |
|                                   |        |                 |                                  |               |           |    |            | TT    | Not published | Not published | 1.161 |     |  |
| C58C1                             | 1/2    | B5              | <i>Chaetomium globosum</i> D38   | Not published | Not       | 18 | Not        | CT    | Not published | Not published | 1.390 | [6] |  |
|                                   | medium |                 |                                  |               | published |    | published  | DT-I  | Not published | Not published | 700   |     |  |
|                                   |        |                 | <i>Chaetomium globosum</i> D38   | 90 mg/L       |           | 18 |            | CT    | Not published | Not published | 1.880 |     |  |
|                                   |        |                 | Extract of Mycelium (EM)         | 60 mg/L       |           | 18 |            | DT-I  | Not published | Not published | 2.000 |     |  |

**Table S2.** Effect of methyl jasmonate and coronatine on diterpenoids production in *in vitro* *Salvia* hairy roots cultures.

| <i>Salvia</i><br><i>sp.</i> | <i>A.</i><br><i>Rhizogenes</i> | Culture<br>medium | Growth condition                                                                                       | Elicitors | Conc. of<br>elicitor | Elicitated<br>on<br>day | Time<br>of<br>elicitation<br>(days) | Biomass<br>growth vs<br>CTRL | Diterpenes<br>stimulated                                        | Yield of control                                         | Yield after<br>elicitation                                 | % Increase<br>over the<br>control | References |
|-----------------------------|--------------------------------|-------------------|--------------------------------------------------------------------------------------------------------|-----------|----------------------|-------------------------|-------------------------------------|------------------------------|-----------------------------------------------------------------|----------------------------------------------------------|------------------------------------------------------------|-----------------------------------|------------|
| <i>S. miltiorrhiza</i>      | ATCC 15834                     | 6,7-V<br>medium   | Not published                                                                                          | MJ        | Not<br>published     | 18                      | 9                                   | Not<br>published             | CT,<br>T-IIA                                                    | Not published                                            | 0.571 mg/g DW<br>1.563 mg/g DW                             | 2.280<br>520                      | [7]        |
|                             | ATCC 15834                     | MS<br>medium      | Hairy roots (0.3 g) in 50<br>mL medium at 110–120<br>rpm on an orbital in<br>darkness at 25°C          | MJ        | 100 µM               | 18                      | 6                                   | Inhibit                      | T-I<br>CT<br>T-IIA<br>DT-I                                      | Not published                                            | Not published                                              | 200<br>290<br>100<br>30           | [8]        |
|                             |                                | 1/2 MS<br>medium  | Hairy roots into 50 mL<br>medium at 100 rpm in<br>the dark and at 25°C                                 | MJ        | 100 µM               | 60                      | 1.5                                 | Not<br>published             | TT (T-I, T-IIA, CT,<br>DT-I)                                    | 3.55 mg/g DW                                             | 11.33 mg/g DW                                              | 210                               | [9]        |
|                             | R1601                          | MS<br>medium      | Hairy roots in 50 mL<br>medium at 120 rpm<br>and at 25°C                                               | MJ        | 100 µM               | 18                      | 7                                   |                              | TT<br>CT<br>T-IIA                                               | Not published<br>Not published<br>Not published          | 1.46 mg/g DW<br>0.65 mg/g DW<br>0.36 mg/g DW               | 220<br>520<br>380                 | [10]       |
|                             | ATCC 15834                     | 6,7-V<br>medium   | Fresh hairy roots 0.2 g<br>into 50 mL liquid<br>medium at 110 rpm in<br>the dark and at 25 °C.         | MJ        | 100 µM               | 18                      | 9                                   | No<br>difference             | CT<br>DT-I                                                      | Not published<br>Not published                           | Not published<br>0.35 mg/g DW                              | 76<br>81                          | [11]       |
|                             | LBA 9402                       | 1/2 B5<br>medium  | Fresh hairy root 8.3 g<br>into sprinkle bioreactor<br>containing 2L at 26 °C<br>under continuous cool- | MJ        | 125µM                | 23                      | 7                                   | Increase                     | Ferruginol<br>Salvipisone<br>Aethiopinone<br>1-Oxo-aethiopinone | 0.9 mg/g DW<br>3.3 mg/g DW<br>4.4 mg/g DW<br>2.9 mg/g DW | 9.7 mg/g DW<br>12.6 mg/g DW<br>40.0 mg/g DW<br>5.2 mg/g DW | 980<br>280<br>810<br>80           | [12]       |

|                                                                      |            |                  |                                                                         |    |        |    |            |                  |                 |                                                      |                  |              |                  |      |              |              |              |               |             |    |
|----------------------------------------------------------------------|------------|------------------|-------------------------------------------------------------------------|----|--------|----|------------|------------------|-----------------|------------------------------------------------------|------------------|--------------|------------------|------|--------------|--------------|--------------|---------------|-------------|----|
| white fluorescent light<br>(40 μmolm <sup>-2</sup> s <sup>-1</sup> ) |            |                  |                                                                         |    |        |    |            |                  |                 |                                                      |                  |              |                  |      |              |              |              |               |             |    |
| S.<br>castaneaDiel                                                   | ATCC 15834 | 1/2 MS<br>medium | Hairy roots (1 g) into<br>100 mL at 120 rpm, at<br>23°C and in the dark | MJ | 100 μM | 21 | 7          | No<br>difference | Aethiopinone    | 0.38                                                 | mg/g             | 9.72 mg/g DW | 2,400            | [13] |              |              |              |               |             |    |
|                                                                      |            |                  |                                                                         |    |        |    |            |                  | Ferruginol      | 1.93 mg/L                                            | 56.13 mg/L       | 2,800        |                  |      |              |              |              |               |             |    |
|                                                                      |            |                  |                                                                         |    |        |    |            |                  | 28              | Inhibit                                              | Aethiopinone     | 4.40 mg/L    | 73.29 mg/L       |      | 1,500        |              |              |               |             |    |
|                                                                      |            |                  |                                                                         |    |        |    | Ferruginol | Not published    | 55.48 mg/L      |                                                      | -                |              |                  |      |              |              |              |               |             |    |
|                                                                      |            |                  |                                                                         |    |        |    | 7          | Corona-<br>tine  | 0.1 μM          | 7                                                    | No<br>difference | Aethiopinone | 0.38             |      | mg/g         | 2.57 mg/g DW | 600          |               |             |    |
|                                                                      |            |                  |                                                                         |    |        |    |            |                  |                 |                                                      |                  | 28           | No<br>difference |      | Aethiopinone | 4.40 mg/L    | 103.32 mg/L  | 2,300         |             |    |
|                                                                      |            |                  |                                                                         |    |        |    |            | Ferruginol       | Not published   | 103.01 mg/L                                          | 5,300            |              |                  |      |              |              |              |               |             |    |
|                                                                      |            |                  |                                                                         |    |        |    |            | Carnosic acid    | Not published   | 36.75 mg/L                                           | 1,700            |              |                  |      |              |              |              |               |             |    |
|                                                                      |            |                  |                                                                         |    |        |    |            | ATCC 15834       | 6,7-V<br>medium | Hairy roots were<br>cultured in into 50 mL<br>medium | MJ               | 200 μM       | 18               |      | 7            | Increase     | T-IIA        | Not published | 1.8 mg/g DW | 99 |
|                                                                      |            |                  |                                                                         |    |        |    | CT         |                  |                 |                                                      |                  |              |                  |      |              |              | 0.34 mg/g DW | 0.51 mg/g DW  | 50          |    |

**Table S3.** Effect of elicitors on diterpenoids production in *in vitro* *Salvia* cell cultures.

| <i>Salvia</i><br><i>sp.</i> | Transformed or non    | Culture medium                                    | Growth condition                                                      | Elicitors       | Conc. of elicitor | Elicited on day | Time of elicitation (days) | Biomass growth vs CTRL | Diterpenes stimulated | Yield of control | Yield after elicitation | % Increase over the control | References |      |
|-----------------------------|-----------------------|---------------------------------------------------|-----------------------------------------------------------------------|-----------------|-------------------|-----------------|----------------------------|------------------------|-----------------------|------------------|-------------------------|-----------------------------|------------|------|
| <i>S. miltiorrhiza</i>      | <i>A. tumefaciens</i> | MS medium without NH <sub>4</sub> NO <sub>3</sub> | Fresh cell culture (ca. 0.4 g) into 20 mL medium in darkness at 25 °C | YE              | 4 g/L             | 7               | 15                         | Inhibit                | TT (CT, T-IIA)        | trace            | 12.23 mg/L              | -                           | [15]       |      |
|                             |                       | B5 medium                                         | 3 g fresh weight in 100 mL at 140 rpm in darkness at 25°C for 16 days | YE              | 4 g/L             | 0               | 8                          | Inhibit                | TT                    | Trace            | 20.1 mg/L               | -                           | [16]       |      |
|                             |                       | 6,7-V medium                                      |                                                                       | YE              | 4 g/L             | 0               | 8                          | Inhibit                | TT                    | Trace            | 22.2 mg/L               | -                           |            |      |
|                             |                       | B5 medium                                         | 3.5 g cell into 50 mL medium at 140 rpm at dark and at 25°C           | YE              | 0,1% (v/v)        | 4               | 5                          | Inhibit                | CT                    | 0 mg/L           | 11.5 mg/L               | -                           | [17]       |      |
|                             | -                     | MS with 0.5 mg/L 2,4-D, 1 mg/L KIN                | Into 100 mL of at 27 ± 0.5 °C at 120 rpm in the dark.                 | SA              | 200 µM            | 18              | 7                          |                        | CT                    | Data shown       | not                     | Not published               | 339        | [18] |
|                             |                       |                                                   |                                                                       | Ag <sup>+</sup> | 60 µM             | 18              | 7                          |                        | CT                    | Data shown       | not                     | Not published               | 1.707      |      |
|                             |                       | MS medium with 2 mg/L 2,4-D and 2 mg/L 6-BA       | 0.3 g fresh cells in 25 ml medium at 110–120 rpm, at 25°C in the dark | SA              | 100 µM            | 18              | 7                          | Inhibit                | CT                    | 59.9 µg/g DW     | 390.0 µg/g DW           | 550                         | [19]       |      |
|                             |                       |                                                   |                                                                       |                 |                   |                 |                            |                        | T-IIA                 | 57.6 µg/g DW     | 72.8 µg/g DW            | 30                          |            |      |
|                             |                       |                                                   |                                                                       | Co              | 50 µM             | 18              | 7                          | Slightly inhibit       | CT                    | 59.9 µg/g DW     | 263.7 µg/g DW           | 340                         |            |      |
|                             |                       |                                                   |                                                                       | Cd              | 25 µM             | 18              | 7                          | Inhibit                | CT                    | 59.9 µg/g DW     | 1,854.0 µg/g DW         | 3.000                       |            |      |
|                             |                       |                                                   |                                                                       |                 |                   |                 |                            |                        |                       |                  |                         |                             |            |      |

|                 |        |    |   |         |            |          |      |               |       |
|-----------------|--------|----|---|---------|------------|----------|------|---------------|-------|
|                 |        |    |   |         | T-IIA      | 57.6     | µg/g | 369.0 µg/g DW | 540   |
|                 |        |    |   |         | DW         |          |      |               |       |
| 6               |        |    |   |         | Volumetric | 1.9 mg/L |      | 10.7mg/L      | 460   |
|                 |        |    |   |         | TT         |          |      |               |       |
| SO              | 50 g/L | 18 | 7 | Inhibit | CT         | 59.9     | µg/g | 584.6 µg/g DW | 880   |
|                 |        |    |   |         | DW         |          |      |               |       |
|                 |        |    |   |         | T-IIA      | 57.6     | µg/g | 83.0 µg/g DW  | 40    |
|                 |        |    |   |         | DW         |          |      |               |       |
| Chitosa         | 100    | 18 | 7 | Inhibit | CT         | 59.9     | µg/g | 597.2 µg/g DW | 900   |
| n               | mg/L   |    |   |         |            |          |      |               |       |
|                 |        |    |   |         | T-I        | 81.6     | µg/g | 276.0 µg/g DW | 240   |
|                 |        |    |   |         | DW         |          |      |               |       |
| MJ              | 100 µM | 18 | 7 | Inhibit | CT         | 59.9     | µg/g | 299.8 µg/g DW | 400   |
|                 |        |    |   |         | DW         |          |      |               |       |
|                 |        |    |   |         | T-IIA      | 57.6     | µg/g | 82.6 µg/g DW  | 40    |
|                 |        |    |   |         | DW         |          |      |               |       |
| Ag <sup>+</sup> | 25 µM  | 18 | 7 | Inhibit | CT         | 59.9     | µg/g | 1,817.5 µg/g  | 2.900 |
|                 |        |    |   |         | DW         |          |      |               |       |
|                 |        |    |   |         | T-IIA      | 57.6     | µg/g | 225.8 µg/g DW | 290   |
|                 |        |    |   |         | DW         |          |      |               |       |
| 6               |        |    |   |         | Volumetric | 1.9 mg/L |      | 11.7 mg/L     | 520   |
|                 |        |    |   |         | TT         |          |      |               |       |
| YE              | 100    | 18 | 7 | Inhibit | CT         | 59.9     | µg/g | 2,011.4 µg/g  | 3.300 |
|                 | mg/L   |    |   |         |            |          |      |               |       |
|                 |        |    |   |         | T-IIA      | 57.6     | µg/g | 190.3 µg/g DW | 230   |
|                 |        |    |   |         | DW         |          |      |               |       |
| 6               |        |    |   |         | Volumetric | 1.9 mg/L |      | 9.2 mg/L      | 380   |
|                 |        |    |   |         | TT         |          |      |               |       |

**Table S4.** Effect of yeast extract on diterpenoids production in *in vitro* *Salvia* hairy root cultures.

| Salvia sp.          | A. Rhizogenes | Culture medium | Growth condition                                                             | Elicitors | Conc. of elicitor | Elicited on day         | Time of elicitation (days) | Biomass growth vs CTRL | Diterpenes stimulated                                        | Yield of control | Yield after elicitation | % Increase over the control | References |                    |
|---------------------|---------------|----------------|------------------------------------------------------------------------------|-----------|-------------------|-------------------------|----------------------------|------------------------|--------------------------------------------------------------|------------------|-------------------------|-----------------------------|------------|--------------------|
| S. miltiorrhiza     | ATCC 15834    | 6, 7-V medium  | 0.3 g fresh root segments in 50 mL medium at 140 rpm in darkness and at 25°C | YE        | Not published     | 20 after renewal medium | 7                          | Increase               | Intracellular CT                                             | 0.01 mg/g DW     | 0.96 mg/g DW            | 9.500                       | [20]       |                    |
|                     |               |                |                                                                              |           |                   |                         |                            |                        | Inhibit                                                      | TT               | Not published           | Not published               | 210        | [21]               |
|                     |               |                |                                                                              |           |                   |                         |                            |                        |                                                              |                  |                         |                             |            |                    |
|                     |               |                |                                                                              |           |                   |                         |                            |                        |                                                              |                  |                         |                             |            |                    |
|                     |               |                |                                                                              |           |                   |                         |                            |                        |                                                              |                  |                         |                             |            |                    |
|                     |               |                |                                                                              |           |                   |                         |                            | MS medium              | 0.3 g fresh weight of roots into 40 mL medium at 110–120 rpm | YE               | 100 µg/mL               | 18                          | 12         | Increase about 30% |
| CT                  | 0.124 mg/g DW | 0.914 mg/g DW  | 640                                                                          |           |                   |                         |                            |                        |                                                              |                  |                         |                             |            |                    |
| TT                  | 0.46 mg/g DW  | 1.37 mg/g DW   | 200                                                                          |           |                   |                         |                            |                        |                                                              |                  |                         |                             |            |                    |
| TT (CT, T-I, T-IIA) | 5.74 mg/L     | 87.5 mg/L      | 1.420                                                                        |           |                   |                         |                            |                        |                                                              |                  |                         |                             |            |                    |
|                     |               |                |                                                                              |           |                   |                         |                            | TT (CT, T-I, T-IIA)    | 0.56 mg/g DW                                                 | 0.668 mg/g DW    | 19                      |                             |            |                    |
|                     |               |                |                                                                              |           |                   |                         |                            |                        |                                                              |                  |                         |                             |            |                    |



|                                    |                   |                                                                   |    |          |    |   |              |                     |               |               |       |      |
|------------------------------------|-------------------|-------------------------------------------------------------------|----|----------|----|---|--------------|---------------------|---------------|---------------|-------|------|
| <i>S. castanea</i><br><i>Diels</i> | MS medium         | 0.3 g fresh weight of roots into 40 mL medium at 110–120 rpm      | YE | 100 mg/L | 21 | 9 | Inhibit      | TT                  | 146.4 µg/g DW | 732.4 µg/g DW | 400   | [23] |
|                                    |                   |                                                                   |    |          |    |   |              | Volumetric          | 1.77 mg/L     | 7.62 mg/L     | 330   |      |
|                                    |                   |                                                                   |    |          |    |   |              | TT                  |               |               |       |      |
|                                    | MS medium         | 0.2 g fresh weight of roots in 25 mL medium at 110–120 rpm        | YE | 25 mg/L  | 21 | 9 | Inhibit      | TT (CT, T-I, T-IIA) | 0.2 mg/g DW   | 0.96 mg/g DW  | 380   | [24] |
|                                    |                   |                                                                   |    |          |    |   |              | Volumetric          | 1.96 mg/L     | 9.92 mg/L     | 400   |      |
|                                    | 6,7-V medium      | 0.2 g fresh hairy roots into 50 mL at 110 rpm in dark and at 25°C | YE | 200 mg/L | 18 | 6 | Increase     | DT-I                | Not published | Not published | 238   | [25] |
|                                    |                   |                                                                   |    |          |    |   |              | CT                  | Not published | Not published | 378   |      |
|                                    |                   |                                                                   |    |          |    |   |              | T-I                 | Not published | Not published | 100   |      |
|                                    | ATCC 15834 medium | Hairy roots were cultured in into 50 mL medium                    | YE | 200 mg/L | 18 | 7 | Increase 73% | CT                  | Not published | 2.84 mg/g DW  | 737   | [14] |
|                                    |                   |                                                                   |    |          |    |   |              | T-IIA               | Not published | 2.52 mg/g DW  | 177   |      |
|                                    |                   |                                                                   |    |          |    |   |              | DT-I                | Not detected  | 1.95 mg/g DW  | -     |      |
|                                    | 6,7-V medium      | 0.2 g fresh hairy roots into 50 mL at 110 rpm in dark and at 25°C | YE | 200 mg/L | 18 | 6 | Increase     | DT-I                | Not published | Not published | 129   | [25] |
|                                    |                   |                                                                   |    |          |    |   |              | CT                  | Not published | Not published | 800   |      |
|                                    |                   |                                                                   |    |          |    |   |              | T-I                 | Not published | Not published | 3.614 |      |
|                                    |                   |                                                                   |    |          |    |   |              | T-IIA               | Not published | Not published | 232   |      |

**Table S5.** Effect of Ag<sup>+</sup> on diterpenoids production in *in vitro* *Salvia* hairy roots cultures.

| <i>Salvia</i> sp.      | A. Rhizogenesis | Culture medium | Growth condition                                                            | Elicitors       | Conc. of elicitor | Elicited on day | Time of elicitation (days) | Biomass growth vs CTRL | Diterpenes stimulated | Yield of control | Yield after elicitation | % Increase over the control   | References |
|------------------------|-----------------|----------------|-----------------------------------------------------------------------------|-----------------|-------------------|-----------------|----------------------------|------------------------|-----------------------|------------------|-------------------------|-------------------------------|------------|
| <i>S. miltiorrhiza</i> | ATCC 15834      | MS medium      | 0.3 g fresh root in 25 mL medium at 110–120 rpm in dark and at 25°C         | Ag <sup>+</sup> | 15 µM             | 18              | 12                         | Inhibit                | TT                    | 0.5 mg/g DW      | 2.3 mg/g DW             | 360                           | [26]       |
|                        |                 |                |                                                                             |                 |                   |                 |                            |                        | Volumetric            | 7.3 mg/L         | 25.3 mg/L               | 250                           |            |
|                        |                 |                |                                                                             |                 |                   |                 |                            |                        | TT                    |                  |                         |                               |            |
|                        |                 |                |                                                                             |                 |                   |                 |                            |                        | Volumetric CT         | 1.76 mg/L        | 12.6 mg/L               | 500                           |            |
|                        |                 |                |                                                                             |                 |                   |                 |                            |                        | Volumetric TT         | Not published    | Not published           | 54 compare to Ag <sup>+</sup> |            |
|                        | MS medium       |                | 0.3 g fresh root in 25 mL medium at 110–120 rpm in dark and at 25°C         | Ag <sup>+</sup> | 30 µM             | 18              | 4                          | Inhibit                | TT                    | Not published    | Not published           | 20                            | [21]       |
|                        |                 |                |                                                                             |                 |                   |                 |                            |                        |                       |                  |                         |                               |            |
|                        |                 |                |                                                                             |                 |                   |                 |                            |                        |                       |                  |                         |                               |            |
|                        |                 |                |                                                                             |                 |                   |                 |                            |                        |                       |                  |                         |                               |            |
|                        |                 |                |                                                                             |                 |                   |                 |                            |                        |                       |                  |                         |                               |            |
|                        | 6,7-V medium    |                | 0.2 g fresh hairy roots in 50 mL medium at 110 rpm in the dark and at 25 °C | Ag <sup>+</sup> | 15 µM             | 18              | 6                          | No difference          | DT-I                  | Not published    | 0.60 mg/g DW            | 156                           | [27]       |
|                        |                 |                |                                                                             |                 |                   |                 |                            |                        | T-I                   | Not published    | 0.82 mg/g DW            | 46                            |            |
|                        |                 |                |                                                                             |                 |                   |                 |                            |                        | CT                    | Not published    | 0.34 mg/g DW            | 42                            |            |
|                        |                 |                |                                                                             |                 |                   |                 |                            |                        | T-IIA                 | Not published    | 0.42 mg/g DW            | 340                           |            |
|                        |                 |                |                                                                             |                 |                   |                 |                            |                        | TT                    | Not published    | 2.37 mg/g DW            | 120                           |            |
|                        | 6,7-V medium    |                | 0.2 g fresh hairy roots into 50 mL at 110 rpm in dark and at 25°C           | Ag <sup>+</sup> | 15 µM             | 18              | 6                          | No difference          | DT-I                  | Not published    | Not published           | 65                            | [25]       |
|                        |                 |                |                                                                             |                 |                   |                 |                            |                        | CT                    | Not published    | Not published           | 64                            |            |
|                        |                 |                |                                                                             |                 |                   |                 |                            |                        | T-I                   | Not published    | Not published           | 85                            |            |

|                          |            |                      |                                                                                     |                  |         |    |   |               |                   |                                                 |                                                 |                      |      |
|--------------------------|------------|----------------------|-------------------------------------------------------------------------------------|------------------|---------|----|---|---------------|-------------------|-------------------------------------------------|-------------------------------------------------|----------------------|------|
| <i>S. castanea</i> Diels | ATCC 10060 | 6, 7-V<br>mediu<br>m | 0.3 g fresh root in 25 mL medium at 110 rpm in dark and at 25°C                     | La <sup>3+</sup> | 0.01 mM | 18 | 1 | Not published | T-I<br>T-II<br>CT | Not published<br>Not published<br>Not published | Not published<br>Not published<br>Not published | 74.9<br>40.9<br>92.4 | [28] |
|                          | ATCC 15834 | 6, 7-V<br>mediu<br>m | Hairy roots (0.2 g fresh mass) in 50 mL medium at 110 rpm in darkness and at 25±1°C | Ce <sup>3+</sup> | 50 µM   | 18 | 3 | No difference | DT-I<br>CT        | Not published<br>Not published                  | 0.875 mg/g DW<br>0.271 mg/g DW                  | 271<br>393           | [29] |
|                          | ATCC 15834 | 6,7-V<br>mediu<br>m  | Hairy roots were cultured in 50 mL medium                                           | Ag <sup>+</sup>  | 15 µM   | 18 | 7 | Increase      | T-IIA             | Not published                                   | Not published                                   | 80                   | [14] |
|                          | ATCC 15834 | 6,7-V<br>mediu<br>m  | 0.2 g fresh hairy roots into 50 mL at 110 rpm in dark and at 25°C                   | Ag <sup>+</sup>  | 15 µM   | 18 | 6 | Increase      | CT<br>T-I         | Not published<br>Not published                  | Not published<br>Not published                  | 233<br>67            | [25] |

**Table S6a.** Effect of others chemical compounds on diterpenoids production in *in vitro* *Salvia* hairy roots cultures.

| Salvia sp.      | A. Rhizogenesis | Culture medium                                    | Growth condition                                                            | Elicitors            | Conc. of elicitor | Elicited on day                                        | Time of elicitation (days) | Biomass growth vs CTRL | Diterpenes stimulated      | Yield of control                                         | Yield after elicitation                                  | % Increase over the control | References |
|-----------------|-----------------|---------------------------------------------------|-----------------------------------------------------------------------------|----------------------|-------------------|--------------------------------------------------------|----------------------------|------------------------|----------------------------|----------------------------------------------------------|----------------------------------------------------------|-----------------------------|------------|
| S. miltiorrhiza |                 | 1/2 MS medium                                     | Hairy roots into 50 mL medium at 100 rpm in the dark and at 25°C            | SA                   | 100 µM            | 60                                                     | 1.5                        | -                      | TT (T-I, T-IIA, CT, DT-I)  | 3.55 mg/g DW                                             | 5.95 mg/g DW                                             | 63                          | [9]        |
|                 | ATCC 15834      | MS medium                                         | 0.2 g of fresh roots in 25 mL medium at 110–120 rpm in the dark and at 25°C | Sorbitol             | 70 g/L            | 21                                                     | 6                          | Slightly increase      | TT                         | 165.1 µg/g DW                                            | 723.6 µg/g DW                                            | 350                         | [23]       |
|                 |                 |                                                   |                                                                             |                      | 50 g/L            |                                                        |                            |                        | Volumetric TT              | 1.69 mg/L                                                | 8.18 mg/L                                                | 380                         |            |
|                 | ATCC 15834      | MS medium                                         | 0.2 g fresh weight of roots in 25 mL medium at 110–120 rpm                  | Sorbitol             | 50 mg/L           | 21                                                     | 9                          | Increase               | TT (CT, T-I, T-IIA)        | 0.2 mg/g DW                                              | 0.67 mg/g DW                                             | 235                         | [24]       |
|                 |                 |                                                   |                                                                             |                      |                   |                                                        |                            |                        | Volumetric TT              | 1.96 mg/L                                                | 10.5 mg/L                                                | 436                         |            |
|                 |                 |                                                   |                                                                             |                      |                   | 21 repeated Sorbitol and nutrient feeding every 5 days | with 21 to 60 days         | No difference          | TT (CT, T-I, T-IIA)        | 0.36 mg/g DW                                             | 3.22 mg/g DW                                             | 794                         |            |
|                 |                 |                                                   |                                                                             |                      |                   |                                                        |                            |                        | Volumetric TT              | 3.01 mg/L                                                | 39.4 mg/L                                                | 1.200                       |            |
|                 | ATCC 15834      | MS medium without NH <sub>4</sub> NO <sub>3</sub> | 0.3 g fresh hairy roots into 50 mL at 110–120 rpm in darkness and at 25°C   | Absciscic acid (ABA) | 200 µM            | 18                                                     | 6                          | Inhibit                | T-I<br>CT<br>DT-I<br>T-IIA | 0.7 mg/g DW<br>1.3 mg/g DW<br>3.2 mg/g DW<br>1.5 mg/g DW | 1.1 mg/g DW<br>1.6 mg/g DW<br>3.9 mg/g DW<br>2.2 mg/g DW | 110<br>170<br>60<br>90      | [30]       |

|       |               |                                                      |           |        |    |    |               |        |               |               |     |      |
|-------|---------------|------------------------------------------------------|-----------|--------|----|----|---------------|--------|---------------|---------------|-----|------|
| ATCC  | Not published | Not published                                        | ABA       | 210 μM | 20 | 7  | Not published | T-I    | Not published | Not published | 440 | [30] |
| 15834 | published     |                                                      |           |        |    |    | published     | CT     | Not published | Not published | 850 |      |
|       |               |                                                      |           |        |    |    |               | DT-I   | Not published | Not published | 50  |      |
|       |               |                                                      |           |        |    |    |               | T-II A | Not published | Not published | 80  |      |
| BCRC  | B5 liquid     | (1.5 cm, ~5.4 mg dw) root                            | (ABA)     | 1.0    | 0  | 84 | No            | T-I    | 0.216 mg/g DW | 0.452 mg/g DW | 109 | [31] |
| 15010 | medium        | in 70 mL medium at 100 rpm in the dark and at 25±2°C | abscisica | mg/L   |    |    | difference    | T-IIA  | 0.120 mg/g DW | 0.341 mg/g DW | 200 |      |
|       |               |                                                      | cid       |        |    |    |               | CT     | 0.374 mg/g DW | 1.038 mg/g DW | 200 |      |
|       |               |                                                      |           |        |    |    |               | TT     | 0.71 mg/g DW  | 1.831 mg/g DW | 150 |      |
|       |               |                                                      | TDZ       | 1.0    |    |    | Increase      | T-I    | 0.216 mg/g DW | 0.393 mg/g DW | 100 |      |
|       |               |                                                      |           | mg/L   |    |    |               | T-IIA  | 0.120 mg/g DW | 0.195 mg/g DW | 50  |      |
|       |               |                                                      |           |        |    |    |               | CT     | 0.374 mg/g DW | 1.310 mg/g DW | 250 |      |
|       |               |                                                      |           |        |    |    |               | TT     | 0.71 mg/g DW  | 1,957 mg/g DW | 170 |      |

**Table S6b.** Effect of other elicitors on diterpenoids production in *in vitro* *Salvia* hairy root cultures.

| <i>Salvia</i>          | <i>A.</i>                       | Culture                 | Growth condition       | Elicitors   | Conc.     | of | Elicited | Time     | of         | Biomass      | Diterpenes    | Yield         | of  | Yield after | % Increase | Referenc |
|------------------------|---------------------------------|-------------------------|------------------------|-------------|-----------|----|----------|----------|------------|--------------|---------------|---------------|-----|-------------|------------|----------|
| <i>sp.</i>             | <i>Rhizogenes</i>               | medium                  |                        |             | elicitor  |    | on day   |          |            | growth vs    | stimulated    | control       |     | elicitation | over       | the es   |
|                        |                                 |                         |                        |             |           |    |          | n (days) |            | CTRL         |               |               |     |             | control    |          |
| <i>S. miltiorrhiza</i> | ATCC 15834                      | MS                      | 0.3 g fresh root in 25 | BABA        | 2 mM      |    | 18       | 4        | Inhibit    | TT (CT, T-I, | 0.24 mg/g DW  | 1.09 mg/g DW  |     | 350         |            | [32]     |
|                        |                                 | medium                  | mL medium at 110–      |             |           |    |          |          |            | T-IIA)       |               |               |     |             |            |          |
|                        |                                 |                         | 120 rpm in dark and at |             |           |    |          |          |            |              |               |               |     |             |            |          |
|                        |                                 |                         | 25°C                   |             |           |    |          |          |            |              |               |               |     |             |            |          |
|                        |                                 | MS                      | Hairy roots (0.3 g) in | SNP         | 100 µM    |    | 18       | 6        | No         | T-I,         | Not published | Not published |     | 80          |            | [30]     |
|                        |                                 | medium                  | 50 mL medium at 110–   |             |           |    |          |          | difference | CT,          |               |               |     | 170         |            |          |
|                        |                                 |                         | 120 rpm on an orbital  |             |           |    |          |          |            | T-IIA        |               |               |     | 180         |            |          |
|                        |                                 |                         | in darkness at 25°C    |             |           |    |          |          |            | DT-I         |               |               |     | 60          |            |          |
|                        | MS                              | 0.3 g fresh hairy roots | Polyethylene           | 2 % (w/v)   |           | 18 | 6        | Inhibit  | T-I        | 0.7 mg/g DW  | 0.9 mg/g DW   |               | 70  |             | [30]       |          |
|                        | medium                          | into 50 mL at 110–120   | glycol (PEG)           |             |           |    |          |          | CT         | 1.3 mg/g DW  | 2.1 mg/g DW   |               | 100 |             |            |          |
|                        | without                         | rpm in darkness and     |                        |             |           |    |          |          | DT-I       | 3.2 mg/g DW  | 3.9 mg/g DW   |               | 60  |             |            |          |
|                        | NH <sub>4</sub> NO <sub>3</sub> | at 25°C                 |                        |             |           |    |          |          | T-IIA      | 1.5 mg/g DW  | 2.0 mg/g DW   |               | 70  |             |            |          |
|                        | ACCC 10060                      | 6, 7-V                  | at 110–120 rpm at 25 ± | Smoke–water | SW 1:1000 |    | 18       | 3        | Not        | T-I          | Not published | Not published |     | 230         |            | [33]     |
|                        | medium                          | 1 °C in darkness        |                        | (SW)        | (v/v)     |    |          |          | published  |              |               |               |     |             |            |          |

**Table S7.** Effect of physical elicitors on diterpenoids production in *in vitro* *Salvia* hairy root cultures.

[illegible]

**Table S8.** Effect of combination of elicitors on diterpenoids production in *in vitro* *Salvia* hairy roots cultures.

| Salvia sp.      | A. Rhizogenesis | Culture medium | Growth condition                                                            | Elicitors     | Conc. of elicitor  | Elicited on day | on day                                     | Time of elicitation (days)       | Biomass growth vs CTRL | Diterpenes stimulated | Yield of control | Yield after elicitation | % Increase over the control | References |
|-----------------|-----------------|----------------|-----------------------------------------------------------------------------|---------------|--------------------|-----------------|--------------------------------------------|----------------------------------|------------------------|-----------------------|------------------|-------------------------|-----------------------------|------------|
| S. miltiorrhiza | ATCC 15834      | MS medium      | 0.3 g fresh root in 25 mL medium at 110–120 rpm in dark and at 25°C         | BABA + YE     | 1 mM + 100 µg/mL   | BABA on 15 days | on day YE on 18                            | 3 days after adding YE           | Inhibit                | TT (CT, T-I, T-IIA)   | 1 mg/g DW        | 2.26 mg/g DW            | 126                         | [32]       |
|                 |                 |                |                                                                             |               |                    |                 |                                            |                                  |                        | Volumetric TT         | 3.2 mg/L         | 20.1 mg/L               | 530                         |            |
|                 | ATCC 15834      | MS medium      | 0.2 g of fresh roots in 25 mL medium at 110–120 rpm in the dark and at 25°C | YE + Sorbitol | 100 mg/L + 50 g/l  | 21              |                                            | 9                                | Inhibit                | TT (CT, T-I, T-IIA)   | 146.4 µg/g DW    | 1481.6 µg/g DW          | 900                         | [23]       |
|                 |                 |                |                                                                             |               |                    |                 |                                            |                                  |                        | Volumetric TT         | 1.77 mg/L        | 16.3 mg/L               | 800                         |            |
|                 | ATCC 15834      | MS medium      | 0.2 g fresh weight (fw) of roots in 25 mL medium at 110–120 rpm             | YE + Sorbitol | 25 mg/L + 50 g/L   | 21              |                                            | 9                                | Increase               | TT (CT, T-I, T-IIA)   | 0.20 mg/g DW     | 1.57 mg/g DW            | 700                         | [24]       |
|                 |                 |                |                                                                             |               |                    |                 |                                            |                                  |                        | Volumetric TT         | 1.96 mg/L        | 27.8 mg/L               | 1.300                       |            |
|                 |                 |                |                                                                             |               |                    | 21 repeated     | with +YE and nutrient feeding every 5 days | Fromdays 21 to day 60 difference | No difference          | TT (CT, T-I, T-IIA)   | 0.36 mg/g DW     | 18.1 mg/g DW            | 4.900                       |            |
|                 |                 |                |                                                                             |               |                    |                 |                                            |                                  |                        | Volumetric TT         | 3.01 mg/L        | 143.6 mg/L              | 4.670                       |            |
|                 | ACCC 10060      | 6,7-V medium   | The root was transferred to 50 mL medium at 80 rpm in dark and at 25°C      | YE + Ag+      | 2.5 mg/mL + 100 µM | 18              |                                            | 5                                | Not published          | DT-I CT               | Not published    | Not published           | 760                         | [35]       |
|                 |                 |                |                                                                             | YE + MJ       | 2.5 mg/mL + 200 µM | 18              |                                            | 5                                | Not published          | TT                    | Not published    | Not published           | 700                         |            |
|                 |                 |                |                                                                             | MJ + Ag+      | 200 µM + 100 µM    | 18              |                                            | 5                                | Not published          | TT, DT-I              | Not published    | Not published           | 170                         |            |
|                 |                 |                |                                                                             |               |                    |                 |                                            |                                  |                        |                       | Not published    | Not published           | 380                         |            |



|       |        |                      |        |           |    |  |             |         |     |               |               |               |               |      |     |
|-------|--------|----------------------|--------|-----------|----|--|-------------|---------|-----|---------------|---------------|---------------|---------------|------|-----|
|       |        |                      |        |           |    |  |             |         |     | CT            | Not published | Not published | 290           | [10] |     |
|       |        |                      |        |           |    |  |             |         |     | DT-I          | Not published | Not published | 800           |      |     |
|       |        |                      |        |           |    |  |             |         |     | published     | CT            | Not published | Not published |      | 660 |
|       |        |                      |        |           |    |  |             |         |     |               |               |               |               |      |     |
|       |        |                      |        |           |    |  |             |         |     |               |               |               |               |      |     |
| R1601 | MS     | Hairy roots in 50 mL | UV-B + | 40 μW/cm² | 18 |  | UV (40 min) | Inhibit | CT  | Not published | 0.97 mg/g DW  | 890           |               |      |     |
|       | medium | medium at 120 rpm    | MJ     | after 100 |    |  | MJ (9 days) |         | T-I | Not published | 0.93 mg/g DW  | 510           |               |      |     |
|       |        | and at 25°C          |        | μM MJ     |    |  |             |         | TT  | Not published | 2.26 mg/g DW  | 570           |               |      |     |
|       |        |                      |        |           |    |  |             |         |     | Volumetric TT | Not published | 28.21 mg/L    | 390           |      |     |
|       |        |                      |        |           |    |  |             |         |     | UV (40 min)   | T-IIA         | Not published | 0.46 mg/g DW  | 240  |     |
|       |        |                      |        |           |    |  |             |         |     | MJ (7 days)   |               |               |               |      |     |

**Table S9.** Effect of combination of elicitors on diterpenoids production in *in vitro* *Salvia* cell cultures.

| <i>Salvia</i> sp.      | Transformed or non    | Culture medium                                    | Growth condition                                                                                   | Elicitors      | Conc. of elicitor         | Elicited on day         | Time of elicitation (days) | Biomass growth vs CTRL | Diterpenes stimulated | Yield of control  | Yield after elicitation | % Increase over the control | References |
|------------------------|-----------------------|---------------------------------------------------|----------------------------------------------------------------------------------------------------|----------------|---------------------------|-------------------------|----------------------------|------------------------|-----------------------|-------------------|-------------------------|-----------------------------|------------|
| <i>S. miltiorrhiza</i> | A. <i>tumefaciens</i> | B5 medium                                         | 3 g fresh weight in 100 mL at 140 rpm in darkness at 25°C for 16 days                              | YE + light (L) | 4 g/L + 4000 lux.         | 0                       | 8                          | Data not shown         | TT                    | No detectable     | 1.92 mg/L               | -                           | [16]       |
|                        |                       |                                                   |                                                                                                    | YE + dark (D)  | 4 g/L                     | 0                       | 8                          |                        | TT                    | No detectable     | 8.76 mg/L               | -                           |            |
|                        |                       |                                                   | 3.5 g of fresh cell into 50 mL medium containing 20 g sucrose/L at 140 rpm in darkness and at 25°C | YE + SA        | YE 0,1% (v/v) + SA 200 µM | 3 and 24 h after add YE | 5                          | Inhibit                | CT                    | 0 mg/L            | 18.9 mg/L               | 37                          | [17]       |
|                        | -                     | MS medium without NH <sub>4</sub> NO <sub>3</sub> | Fresh cell culture (ca. 0.4 g) into 20 mL medium in darkness at 25 °C                              | YE + SA        | 0.12 mL + 200 µM          | 7                       | 15                         | Inhibit                | TT (CT, T-IIA)        | Hardly detectable | 15.07 mg/L              | -                           | [15]       |

References

1. Wu, J.-Y.; Ng, J.; Shi, M.; Wu, S.-J. Enhanced secondary metabolite (tanshinone) production of *Salvia miltiorrhiza* hairy roots in a novel root–bacteria coculture process. *Appl. Microbiol. Biotechnol.* **2007**, *77*, 543–550.

2. Zhao, J.L.; Zhou, L.G.; Wu, J.Y. Promotion of *Salvia miltiorrhiza* hairy root growth and tanshinone production by polysaccharide–protein fractions of plant growth-promoting rhizobacterium *Bacillus cereus*. *Process Biochem.* **2010**, *45*, 1517–1522.

3. Ming, Q.; Han, T.; Li, W.; Zhang, Q.; Zhang, H.; Zheng, C.; Huang, F.; Rahman, K.; Qin, L. Tanshinone IIA and tanshinone I production by *Trichoderma atroviride* D16, an endophytic fungus in *Salvia miltiorrhiza*. *Phytomedicine* **2012**, *19*, 330–333.
4. Yan, Y.; Zhang, S.; Zhang, J.; Ma, P.; Duan, J.-L.; Liang, Z. Effect and mechanism of endophytic bacteria on growth and secondary metabolite synthesis in *Salvia miltiorrhiza* hairy roots. *Acta Physiol. Plant.* **2014**, *36*, 1095–1105.
5. Yan, Y.; Zhang, S.; Yang, D.; Zhang, J.; Liang, Z. Effects of *Streptomyces pactum* Act12 on *Salvia miltiorrhiza* hairy root growth and tanshinone synthesis and its mechanisms. *Appl. Biochem. Biotechnol.* **2014**, *173*, 883–893.
6. Zhai, X.; Luo, D.; Li, X.; Han, T.; Jia, M.; Kong, Z.; Ji, J.; Rahman, K.; Qin, L.; Zheng, C. Endophyte *Chaetomium globosum* D38 promotes bioactive constituents accumulation and root production in *Salvia miltiorrhiza*. *Front. Microbiol.* **2018**, *8*, 2694.
7. Wang, X.; Cui, G.; Huang, L.; Qiu, D. Effects of methyl jasmonate on accumulation and release of tanshinones in suspension cultures of *Salvia miltiorrhiza* hairy root. *Zhongguo Zhong yao za zhi= Zhongguo zhongyao zazhi= China journal of Chinese materia medica* **2007**, *32*, 300–302.
8. Liang, Z.-S.; Yang, D.-F.; Liang, X.; Zhang, Y.-J.; Liu, Y.; Liu, F.-H. Roles of reactive oxygen species in methyl jasmonate and nitric oxide-induced tanshinone production in *Salvia miltiorrhiza* hairy roots. *Plant cell reports* **2012**, *31*, 873–883.
9. Hao, X.; Shi, M.; Cui, L.; Xu, C.; Zhang, Y.; Kai, G. Effects of methyl jasmonate and salicylic acid on tanshinone production and biosynthetic gene expression in transgenic *Salvia miltiorrhiza* hairy roots. *Biotechnol Appl Biochem* **2015**, *62*, 24–31, doi:10.1002/bab.1236.
10. Wang, C.H.; Zheng, L.P.; Tian, H.; Wang, J.W. Synergistic effects of ultraviolet-B and methyl jasmonate on tanshinone biosynthesis in *Salvia miltiorrhiza* hairy roots. *Journal of photochemistry and photobiology. B, Biology* **2016**, *159*, 93–100, doi:10.1016/j.jphotobiol.2016.01.012.
11. Xing, B.; Yang, D.; Liu, L.; Han, R.; Sun, Y.; Liang, Z. Phenolic acid production is more effectively enhanced than tanshinone production by methyl jasmonate in *Salvia miltiorrhiza* hairy roots. *Plant Cell, Tissue and Organ Culture (PCTOC)* **2018**, *134*, 119–129.
12. Kuźma, Ł.; Bruchajzer, E.; Wysokińska, H. Methyl jasmonate effect on diterpenoid accumulation in *Salvia sclarea* hairy root culture in shake flasks and sprinkle bioreactor. *Enzyme Microb. Technol.* **2009**, *44*, 406–410.
13. Vaccaro, M.C.; Mariaevelina, A.; Malafronte, N.; De Tommasi, N.; Leone, A. Increasing the synthesis of bioactive abietane diterpenes in *Salvia sclarea* hairy roots by elicited transcriptional reprogramming. *Plant Cell Rep.* **2017**, *36*, 375–386.
14. Li, B.; Wang, B.; Li, H.; Peng, L.; Ru, M.; Liang, Z.; Yan, X.; Zhu, Y. Establishment of *Salvia castanea* Diels f. *tomentosa* Stib. hairy root cultures and the promotion of tanshinone accumulation and gene expression with Ag(+), methyl jasmonate, and yeast extract elicitation. *Protoplasma* **2016**, *253*, 87–100, doi:10.1007/s00709-015-0790-9.
15. Li, G.-J.; Wang, S.-C.; Xia, K.; Zhou, X. Effect of yeast elicitor and salicylic acid on the fluctuation of phytohormone contents in Ti-transformed *Salvia miltiorrhiza* cell cultures. *Plant Growth Regul.* **2003**, *39*, 27–32.

16. Chen, H.; Yuan, J.-P.; Chen, F.; Zhang, Y.-L.; Song, J.-Y. Tanshinone production in Ti-transformed *Salvia miltiorrhiza* cell suspension cultures. *J. Biotechnol.* **1997**, *58*, 147–156.
17. Chen, H.; Chen, F. Effects of methyl jasmonate and salicylic acid on cell growth and cryptotanshinone formation in Ti transformed *Salvia miltiorrhiza* cell suspension cultures. *Biotechnol. Lett.* **1999**, *21*, 803–807.
18. Yu, Y.; Wang, T.; Wu, Y.; Zhou, Y.; Jiang, Y.; Zhang, L. Effect of elicitors on the metabolites in the suspension cell culture of *Salvia miltiorrhiza* Bunge. *Physiol. Mol. Biol. Plants* **2019**, *25*, 229–242.
19. Zhao, J.-L.; Zhou, L.-G.; Wu, J.-Y. Effects of biotic and abiotic elicitors on cell growth and tanshinone accumulation in *Salvia miltiorrhiza* cell cultures. *Applied Microbiology and Biotechnology* **2010**, *87*, 137–144.
20. Chen, H.; Chena, F.; Chiu, F.C.; Lo, C.M. The effect of yeast elicitor on the growth and secondary metabolism of hairy root cultures of *Salvia miltiorrhiza*. *Enzyme Microb Technol* **2001**, *28*, 100–105.
21. Ge, X.; Wu, J. Tanshinone production and isoprenoid pathways in *Salvia miltiorrhiza* hairy roots induced by Ag<sup>+</sup> and yeast elicitor. *Plant science* **2005**, *168*, 487–491.
22. Yan, Q.; Hu, Z.; Tan, R.X.; Wu, J. Efficient production and recovery of diterpenoid tanshinones in *Salvia miltiorrhiza* hairy root cultures with in situ adsorption, elicitation and semi-continuous operation. *J. Biotechnol.* **2005**, *119*, 416–424.
23. Shi, M.; Kwok, K.W.; Wu, J.Y. Enhancement of tanshinone production in *Salvia miltiorrhiza* Bunge (red or Chinese sage) hairy-root culture by hyperosmotic stress and yeast elicitor. *Biotechnol Appl Biochem* **2007**, *46*, 191–196, doi:10.1042/BA20060147.
24. Wu, J.-Y.; Shi, M. Ultrahigh diterpenoid tanshinone production through repeated osmotic stress and elicitor stimulation in fed-batch culture of *Salvia miltiorrhiza* hairy roots. *Appl. Microbiol. Biotechnol.* **2008**, *78*, 441–448.
25. Yang, D.; Fang, Y.; Xia, P.; Zhang, X.; Liang, Z. Diverse responses of tanshinone biosynthesis to biotic and abiotic elicitors in hairy root cultures of *Salvia miltiorrhiza* and *Salvia castanea* Diels f. *tomentosa*. *Gene* **2018**, *643*, 61–67.
26. Zhang, C.; Yan, Q.; Cheuk, W.-k.; Wu, J. Enhancement of tanshinone production in *Salvia miltiorrhiza* hairy root culture by Ag<sup>+</sup> elicitation and nutrient feeding. *Planta Med.* **2004**, *70*, 147–151.
27. Xing, B.; Yang, D.; Guo, W.; Liang, Z.; Yan, X.; Zhu, Y.; Liu, Y. Ag<sup>+</sup> as a more effective elicitor for production of tanshinones than phenolic acids in *Salvia miltiorrhiza* hairy roots. *Molecules* **2015**, *20*, 309–324.
28. Bian, L.; Zou, L.; Zhou, B.; Liu, W.; Zhou, J.; Wang, X. Effect of Lanthanum on accumulation of active constituent and key enzymes expression of *Salvia miltiorrhiza* hairy root. *Zhongguo Zhong yao za zhi= Zhongguo zhongyao zazhi= China journal of Chinese materia medica* **2016**, *41*, 4344–4349.
29. Han, M.; Guo, W.; Liang, Z.; Yang, D.; Yan, X.; Zhu, Y.; Liu, Y. Effects of cerous nitrate on growth and tanshinone production in *Salvia miltiorrhiza* hairy roots. *J. Rare Earths* **2015**, *33*, 1228–1235.

30. Yang, D.; Sheng, D.; Duan, Q.; Liang, X.; Liang, Z.; Liu, Y. PEG and ABA trigger the burst of reactive oxygen species to increase tanshinone production in *Salvia miltiorrhiza* hairy roots. *J. Plant Growth Regul.* **2012**, *31*, 579–587.
31. Gupta, S.K.; Liu, R.-B.; Liaw, S.-Y.; Chan, H.-S.; Tsay, H.-S. Enhanced tanshinone production in hairy roots of '*Salvia miltiorrhiza* Bunge' under the influence of plant growth regulators in liquid culture. *Bot Stud* **2011**, *52*, 435–443.
32. Ge, X.; Wu, J. Induction and potentiation of diterpenoid tanshinone accumulation in *Salvia miltiorrhiza* hairy roots by  $\beta$ -aminobutyric acid. *Appl. Microbiol. Biotechnol.* **2005**, *68*, 183–188.
33. Zhou, J.; Ran, Z.; Xu, Z.; Liu, Q.; Huang, M.; Fang, L.; Guo, L. Effects of smoke-water and smoke-isolated karrikinolide on tanshinones production in *Salvia miltiorrhiza* hairy roots. *S. Afr. J. Bot.* **2018**, *119*, 265–270.
34. Chen, I.J.; Lee, M.S.; Lin, M.K.; Ko, C.Y.; Chang, W.T. Blue light decreases tanshinone IIA content in *Salvia miltiorrhiza* hairy roots via genes regulation. *Journal of photochemistry and photobiology. B, Biology* **2018**, *183*, 164–171, doi:10.1016/j.jphotobiol.2018.04.013.
35. Cheng, Q.; He, Y.; Li, G.; Liu, Y.; Gao, W.; Huang, L. Effects of combined elicitors on tanshinone metabolic profiling and SmCPS expression in *Salvia miltiorrhiza* hairy root cultures. *Molecules* **2013**, *18*, 7473–7485, doi:10.3390/molecules18077473.
